# Supplementary material
Source: Research Square preprint supplement (doi:10.21203/rs.3.rs-8876425/v1)
Supplement: Supplementary file 1 [file 15a61ebb235d456659694db2.docx]

**Extended Data Table 4a |** Antibodies used for human macrophage flow cytometry

| Target / Host species | Fluorophore | Dilution (final) | Clone | Catalogue number | Vendor |
| --- | --- | --- | --- | --- | --- |
| Anti-human BAFF (mouse monoclonal) | PE | 1/10 | 121808 | IC1357P | R&D Systems |
| Anti-human IL-1β (mouse monoclonal) | APC | 1/200 | JK1B-1 | 508208 | BioLegend |
| Anti-human IL-6 (rat monoclonal) | FITC | 1/200 | MQ2-13A5 | 501104 | BioLegend |
| Anti-human TNF (mouse monoclonal) | AF700 | 1/200 | MAb11 | 557996 | BD Biosciences |

**Extended Data Table 4b |** Antibodies used for immunofluorescence

| Target / Host species | Fluorophore | Dilution (final) | Clone | Catalogue number | Vendor |
| --- | --- | --- | --- | --- | --- |
| Anti-mouse ZO-1 (rabbit polyclonal) | N/A | 1/50 | NA | 61-7300 | Thermo Fisher |
| Anti-rabbit IgG secondary antibody (goat polyclonal) | FITC | 1/1000 | NA | A27034 | Thermo Fisher |
| Anti-mouse GFAP (mouse monoclonal) | FITC | 1/50 | GA-5 | 53-9892-82 | Thermo Fisher |
| Anti-mouse IBA-1 (rabbit polyclonal) | N/A | 1/500 | N/A | PA5-27436 | BioLegend |
