# Supplementary material
Source: Research Square preprint supplement (doi:10.21203/rs.3.rs-8876425/v1)
Supplement: Supplementary file 2 [file 3a80b026a03a039fb9ad44d0.docx]

**Extended Data Table 3 |** Primer sequences

| Primer | Species | Forward | Reverse |
| --- | --- | --- | --- |
| *NLRP3* | **Human** | GAT CTT CGC TGC GAT CAA CA | GGG ATT CGA AAC ACG TGC ATT A |
| *IL1B* | **Human** | CCA GGG ACA GGA TAT GGA GCA | TTC AAC ACG CAG GAC AGG TAC AG |
| *IL6* | **Human** | CTT CGG TCC AGT TGC CTT CTC | TCA ATT CGT TCT GAA GAG GTG AGT |
| *TNF* | **Human** | AGC CCA TGT TGT AGC AAA CC | TGA GGT ACA GGC CCT CTG AT |
| *TNFSF13B* | **Human** | CGG GAC TGA AAA TCT TTG AAC CAC | TGT AAG ATC CTG TTT CTT CTG GAC C |
| *IFNG* | **Human** | GGC TTA ATT CTC TCG GAA ACG ATG | TTC TTT TAC ATA TGG GTC CTG GCA |
| *S100B* | **Human** | ACA AGG AAG AGG ATG TCT GAG C | TGA TGA GCT CCT TCA GTT CGG |
| *S100A9* | **Human** | TCG GCT TTG ACA GAG TGC AA | GCC CCA GCT TCA CAG AGT AT |
| *S100A8* | **Human** | TTT CAG AAG ACC TGG TGG GG | CCC TGT AGA CGG CAT GGA AA |
| *S100A12* | **Human** | ATT CCT GTG CAT TGA GGG GT | GTG TCA AAA TGC CCC TTC CG |
| *MMP8* | **Human** | AAG CCA GGA GGG GTA GAG TT | TCC AGG TAG TCC TGA ACA GT |
| *MMP9* | **Human** | GGA CAA GCT CTT CGG CTT CT | TCG CTG GTA CAG GTC GAG TA |
| *TREML2* | **Human** | CTA CAA AAA CCG CGT GGA GG | ATC GTC CTG CAG CAA GTA GC |
| *AIF1* | **Human** | GCT ATG AGC CAA ACC AGG GA | TGG AGG GCA GAT CCT CAT CA |
| *LILRB2* | **Human** | TTG TCA GGG GAG CCT TGA A | CAG CCA TAT CGC CCT GTG TG |
| *TNFRSF13C* | **Human** | GAG AAG GGC AGG AAG GAA CC | CAA ACA CAA ACA CCC CAC CC |
| *CD163* | **Human** | ACC CAG TGA GTT CAG CCT TT | AGA GAG GTG AAT TTC TGC TCC A |
| *CD93* | **Human** | TGA TTG CTC TCA CAG CCC AG | CAC AGA GGG GTT CCA TGA CC |
| *CXCL1* | **Human** | TCT GGC TTA GAA CAA AGG GGC | TAA AGG TAG CCC TTG TTT CCC C |
| *Nlrp3* | **Mouse** | AGA AGA GTG GAT GGG TTT GCT | GCG TTC CTG TCC TTG ATA GAG |
| *Il1b* | **Mouse** | TGA AAT GCC ACC TTT TGA CAG | CCA CAG CCA CAA TGA GTG ATA C |
| *Il6* | **Mouse** | TTT GCC GAG TAG ATC TCA AAG TGA | ATG CTC TCC TAA CAG ATA AGC TGG |
| *Tnf* | **Mouse** | CAC ACT CAC AAA CCA CCA AGT G | GAA GAG AAC CTG GGA GTA GAC AAG |
| *Tnfsf13b* | **Mouse** | GTC GCT CTC ATG CAA ACT GA | CCA TCA CTC CGC AGA AGG A |
| *Gapdh* | **Mouse** | CTG CTT CAC CAC CTT CTT GA | AAG GTC ATC CCA GAG CTG AA |
