# Supplementary material
Source: Research Square preprint supplement (doi:10.21203/rs.3.rs-8876425/v1)
Supplement: Supplementary file 3 [file 649048ca295bf3d997094533.docx]

**Extended Data Table 1 |** Characteristics of cohort participants included in microbiome analyses on enrolment

| Characteristic | Pandemic controls  n=12 | Long COVID  n=91 | *P* value |
| --- | --- | --- | --- |
| Age, years median (IQR) | 50 (47-62) | 47 (39-58) | 0.73 |
| Female sex, n (%) | 6 (50%) | 58 (64) |  |
| Body mass index, kg/m2, median (IQR) | 29.6 (26.1-31.0) | 25.3 (22.2-28.4) | 0.034 |
| Time since SARS-CoV2 infection at enrolment, months, median (IQR) | NA | 5.4 (4.0-10.0) | NA |
| Hospitalized during acute COVID-19, n (%) | NA | 0 (0) | NA |
| Vaccinated prior to infection, n (%) | NA | 10 (11) | NA |
| ≥1 vaccine dose before enrolment, n (%) | 12 (100%) | 59 (65) | 0.016 |
| Pre-existing autoimmune disease, n (%) | 0 (0) | 16 (18) | 0.205 |
| Pre-existing gastrointestinal disease, n (%) | 0 (0) | 19 (21) | 0.117 |
| Number of long COVID symptoms, median (IQR) | NA | 6 (4-9) | NA |

*P* values were calculated using Wilcoxon rank-sum (two-sided) test or Fisher’s exact test, as appropriate. IQR, interquartile range; NA, not applicable.
