# Supplementary material
Source: Research Square preprint supplement (doi:10.21203/rs.3.rs-8876425/v1)
Supplement: Supplementary file 4 [file 776ea29a319fa7bb8678a3d7.docx]

**Extended Data Table 2 |** Mouse experiments and group sizes

| Experiment | Donor group;  Sample identifier | Neurobehavioural test | n (mice) | Sex |
| --- | --- | --- | --- | --- |
| Microbiota colonisation; experiment 1 | No-Neuro; LC1 | Open-field | 5 | Female |
| Microbiota colonisation; experiment 1 | Neuro; LC2 | Open-field | 5 | Female |
| Microbiota colonisation; experiment 2 | No-Neuro; LC3 | Open-field | 5 | Female |
| Microbiota colonisation; experiment 2 | Neuro; LC4 | Open-field | 5 | Female |
| Microbiota colonisation; experiment 3 | No-Neuro; LC5 | Open-field | 5 | Female |
| Microbiota colonisation; experiment 3 | Neuro; LC6 | Open-field | 5 | Female |
| Microbiota colonisation; experiment 4 | Mild; LC8 | Open-field | 5 | Female |
| Microbiota colonisation; experiment 4 | Severe; LC7 | Open-field | 5 | Female |
| GMEV gavage; experiment 1 | Vehicle | Y-maze/Open-field | 3 | Female |
| GMEV gavage; experiment 1 | PC; PC1 | Y-maze/Open-field | 4 | Female |
| GMEV gavage; experiment 1 | No-Neuro; LC3 | Y-maze/Open-field | 4 | Female |
| GMEV gavage; experiment 1 | Neuro; LC7 | Y-maze/Open-field | 4 | Female |
| GMEV gavage; experiment 2 | Vehicle | Y-maze/Open-field | 3 | Female |
| GMEV gavage; experiment 2 | PC; PC2 | Y-maze/Open-field | 4 | Female |
| GMEV gavage; experiment 2 | No-Neuro; LC1 | Y-maze/Open-field | 4 | Female |
| GMEV gavage; experiment 2 | Neuro; LC2 | Y-maze/Open-field | 4 | Female |
| GMEV gavage; experiment 3 | Vehicle | Y-maze/Open-field | 3 | Female |
| GMEV gavage; experiment 3 | PC; PC3 | Y-maze/Open-field | 4 | Female |
| GMEV gavage; experiment 3 | No-Neuro; LC8 | Y-maze/Open-field | 4 | Female |
| GMEV gavage; experiment 3 | Neuro; LC4 | Y-maze/Open-field | 4 | Female |

All mice were female C57BL/6. Faecal microbiota colonisation experiments were performed in germ-free mice; GMEV oral-gavage experiments were performed in wild-type specific pathogen-free mice. Vehicle, sterile phosphate-buffered saline (PBS).
